# Supplementary material for: Frequency of bystander exposure to antibiotics for enteropathogenic bacteria among young children in low-resource settings
Source: PubMed Central journal article supplement (PMC9457395; doi:10.1073/pnas.2208972119), 2022-08-29
Supplement: pnas.2208972119.sapp.pdf [file pnas.2208972119.sapp.pdf]

**Supplementary appendix**

**Frequency of bystander exposure to antibiotics for enteropathogenic bacteria among young children in low-resource settings**

Elizabeth T Rogawski McQuade, Stephanie A Brennhofer, Sarah E Elwood, Timothy L McMurry, Joseph A Lewnard, Estomih R Mduma, Sanjaya Shrestha, Najeeha Iqbal, Pascal O Bessong, Gagandeep Kang, Margaret Kosek, Aldo A M Lima, Tahmeed Ahmed, Jie Liu, Eric R Houpt, James A Platts-Mills

Correspondence to: Elizabeth T Rogawski McQuade  
Email: erogaws@emory.edu

**Table S1. Site-specific incidence rates of asymptomatically carried pathogen exposures to antibiotics for the most common bacterial infections among 1715 children in the MAL-ED cohort.**

| Asymptomatically carried pathogens | Dhaka, Bangladesh       | Fortaleza, Brazil | Vellore, India       | Bhaktapur, Nepal     | Loreto, Peru         | Naushero Feroze, Pakistan | Venda, South Africa | Haydom, Tanzania     | Overall              |
|------------------------------------|-------------------------|-------------------|----------------------|----------------------|----------------------|---------------------------|---------------------|----------------------|----------------------|
| EAEC                               | 394.6 (375.2, 413.4)    | 17.4 (11.7, 23.1) | 246.9 (235.9, 258.1) | 113.6 (105.8, 122.3) | 343.2 (329.2, 356.5) | 400.8 (381.6, 422.4)      | 37.1 (32.1, 42.4)   | 243.4 (234.6, 253.7) | 229.6 (224.0, 235.4) |
| <i>Campylobacter</i>               | 350.4 (327.8, 372.7)    | 8.7 (4.8, 13.0)   | 95.0 (83.2, 107.0)   | 67.8 (59.7, 75.9)    | 136.2 (122.9, 150.4) | 315.7 (292, 341.1)        | 10.8 (7.7, 14.2)    | 163.8 (152.6, 176.2) | 147.2 (141.7, 153.4) |
| ETEC                               | 413.4 (394.1, 432.7)    | 4.6 (1.6, 7.7)    | 117.4 (107.6, 126.8) | 54.6 (47.1, 61.9)    | 176.2 (163.0, 189.8) | 199.4 (184.5, 215.4)      | 11.0 (7.9, 14.6)    | 188.3 (176.2, 200.7) | 146.9 (141.7, 152.4) |
| aEPEC                              | 227.3 (212.3, 242.3)    | 18.3 (13.9, 22.8) | 103.2 (92.5, 114.0)  | 65.7 (58.4, 73.7)    | 149.3 (136.4, 162.3) | 136.4 (122.7, 148.7)      | 19.9 (16.3, 23.6)   | 103.3 (93.9, 113.5)  | 104.0 (99.8, 108.1)  |
| tEPEC                              | 175.8 (161.2, 190.6)    | 4.1 (1.7, 6.7)    | 68.6 (60.9, 76.9)    | 20.1 (15.6, 24.9)    | 82.4 (73.0, 92.4)    | 124.6 (111.5, 136.9)      | 5.4 (3.4, 7.6)      | 70.7 (61.7, 79.6)    | 70.3 (67.0, 73.6)    |
| <i>Shigella</i>                    | 109.3 (97.8, 122.1)     | 4.1 (1.7, 6.6)    | 42.1 (34.9, 50.0)    | 13.4 (9.8, 17.9)     | 68.5 (58.9, 79.1)    | 66.5 (56.7, 76.8)         | 5.1 (3.0, 7.3)      | 56.6 (49.1, 64.1)    | 46.1 (43.2, 48.8)    |
| Any bacterial pathogen             | 1670.6 (1612.7, 1725.3) | 57.3 (47.1, 66.7) | 673.3 (645.8, 700.5) | 335.3 (317.6, 354.4) | 955.9 (917.8, 994.7) | 1243.3 (1193.4, 1298.0)   | 89.4 (81.2, 97.6)   | 826 (797.9, 855.0)   | 744.1 (729.1, 760.6) |

Data are incidence rates per 100 child years with 95% confidence intervals (CIs). EAEC = enteroaggregative *Escherichia coli*. ETEC= enterotoxigenic *Escherichia coli*. aEPEC = atypical enteropathogenic *Escherichia coli*. tEPEC = typical enteropathogenic *Escherichia coli*.

**Figure S1. Sensitivity analysis: Incidence rates per 100 child years of asymptotically carried enteric pathogen exposures to antibiotics among 1715 children in the MAL-ED cohort when bystander pathogens were identified from the nearest stool collected in the 7 days prior to the antibiotic course.**

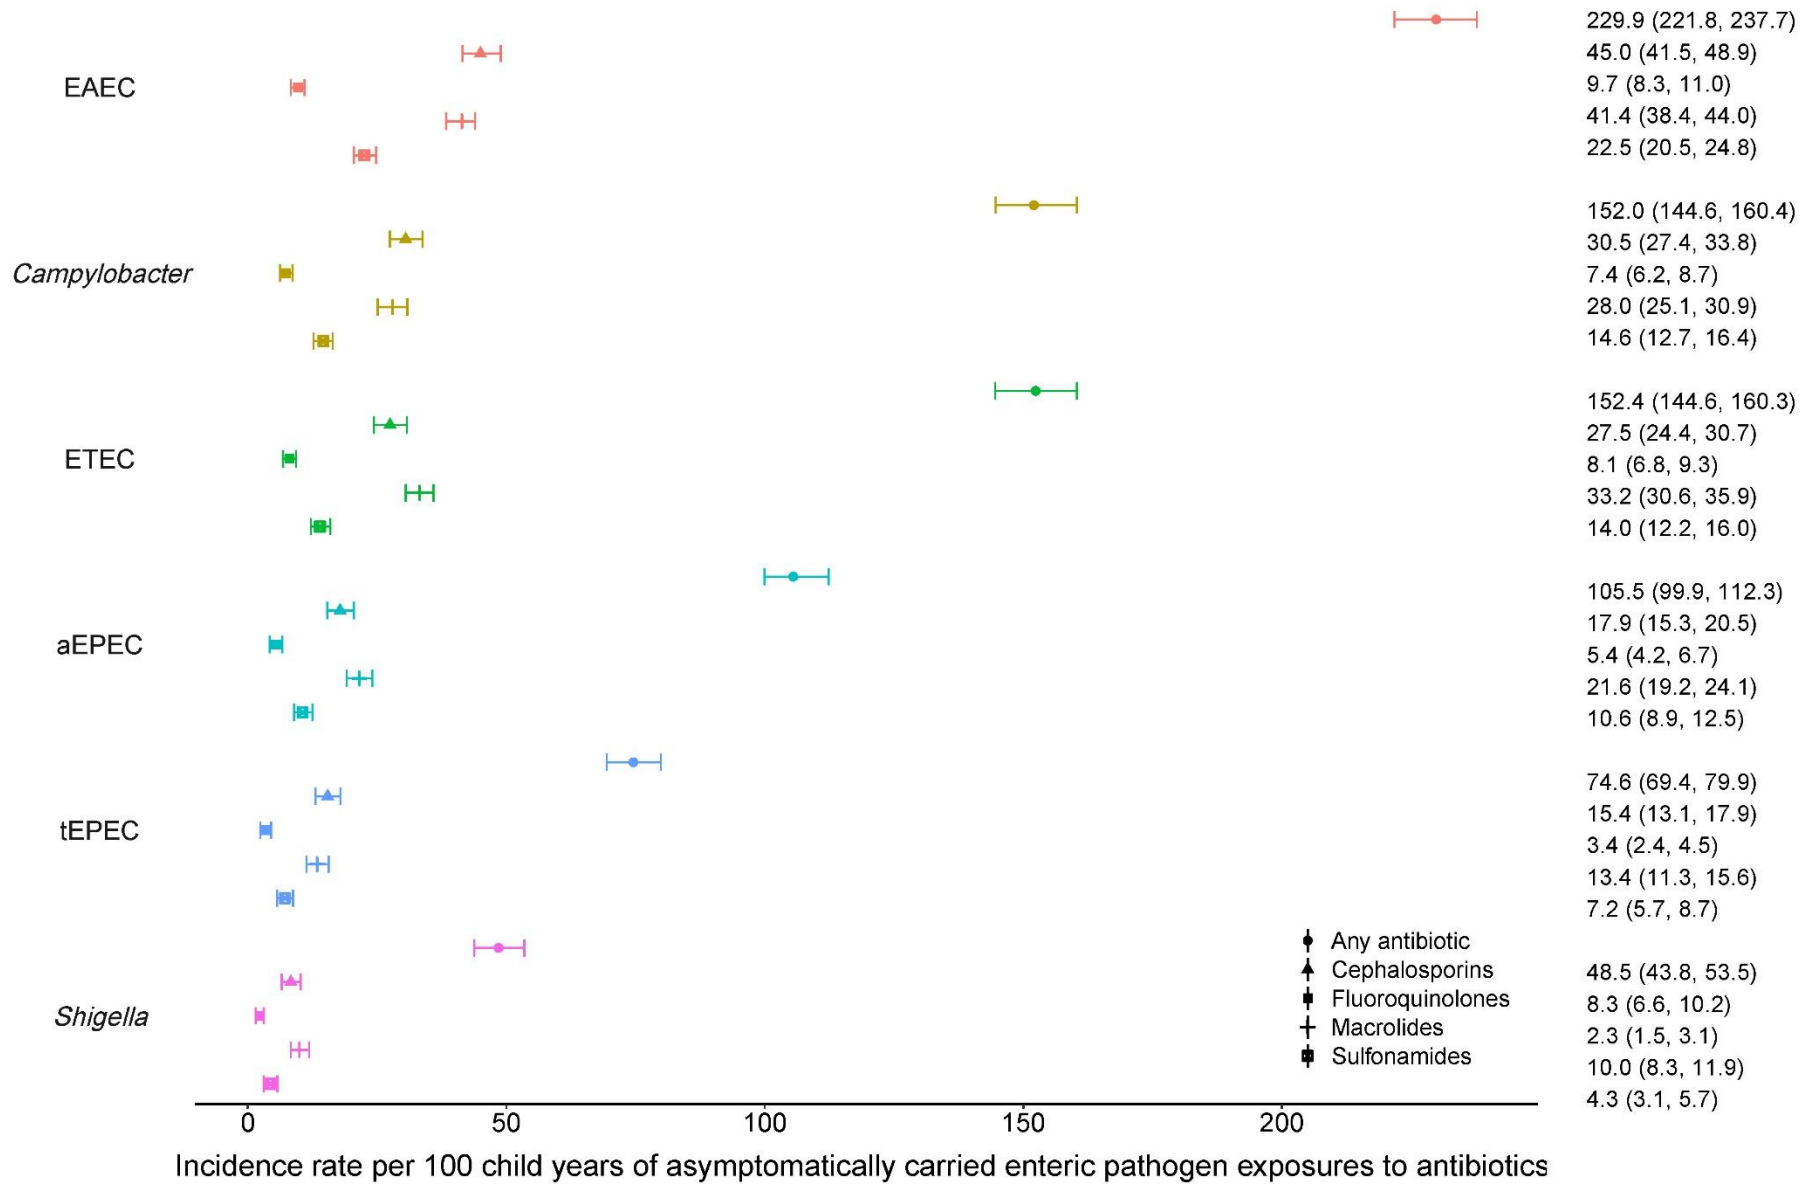

**Figure S2. Sensitivity analysis: Incidence rates per 100 child years of asymptotically carried enteric pathogen exposures to antibiotics among 1715 children in the MAL-ED cohort when bystander pathogens were identified from the nearest stool collected in the 21 days prior to the antibiotic course.**

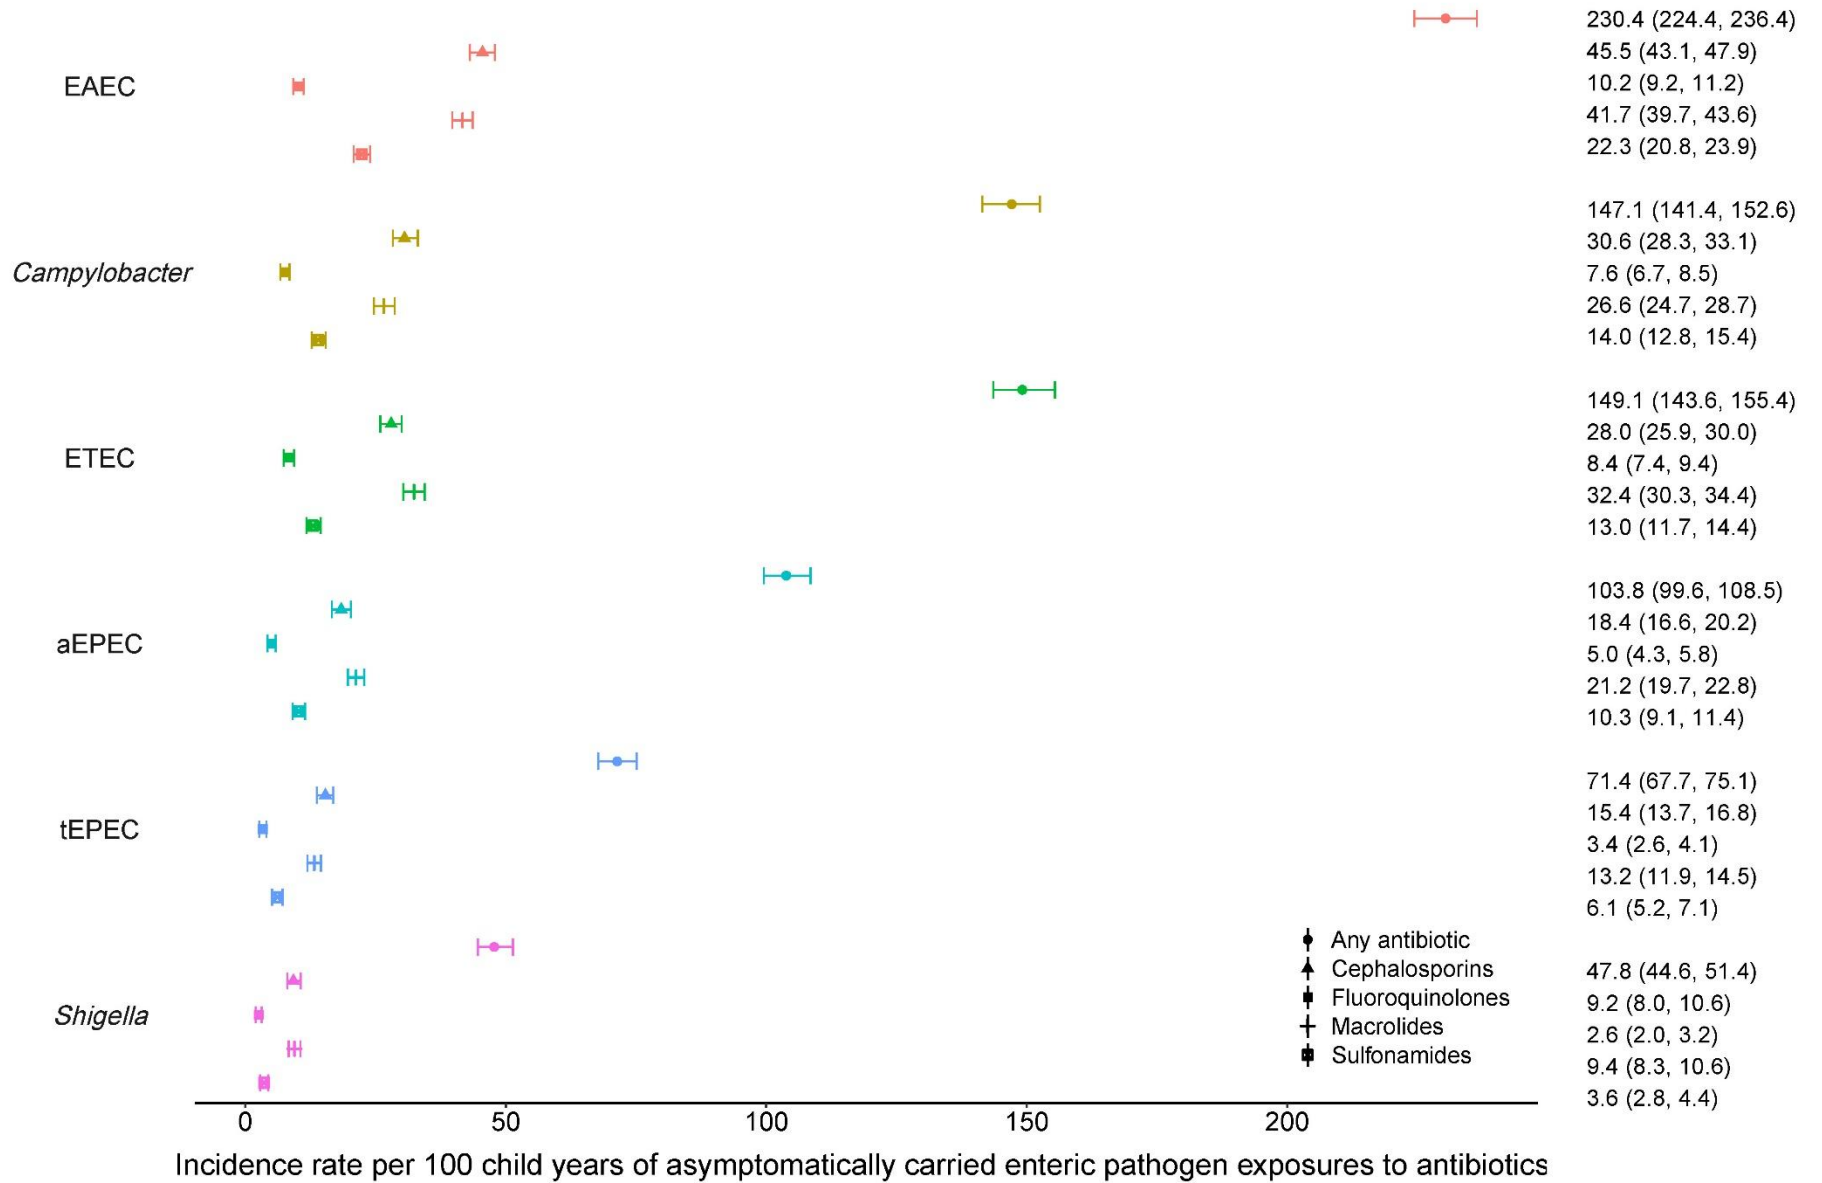

**Table S2. Site and drug class-specific incidence rates of asymptotically carried pathogen exposures to antibiotics for any bacterial pathogen among 1715 children in the MAL-ED cohort.**

| <b>Drug classes</b>                                                                                          | <b>Dhaka,<br/>Bangladesh</b> | <b>Fortaleza,<br/>Brazil</b> | <b>Vellore,<br/>India</b> | <b>Bhaktapur,<br/>Nepal</b> | <b>Loreto,<br/>Peru</b> | <b>Naushero Feroze,<br/>Pakistan</b> | <b>Venda,<br/>South Africa</b> | <b>Haydom,<br/>Tanzania</b> | <b>Overall</b>       |
|--------------------------------------------------------------------------------------------------------------|------------------------------|------------------------------|---------------------------|-----------------------------|-------------------------|--------------------------------------|--------------------------------|-----------------------------|----------------------|
| Cephalosporins                                                                                               | 367.0 (330.8, 401.2)         | 14.2 (8.2, 20.5)             | 211.7 (188.3, 237.7)      | 52.5 (41.3, 64.6)           | 29.4 (19.3, 39.9)       | 419.9 (383.7, 458.2)                 | 0.5 (0.0, 1.4)                 | 3.3 (0.3, 7.4)              | 145.9 (137.5, 154.6) |
| Fluoroquinolones                                                                                             | 169.2 (144.0, 193.7)         | 0.0 (0.0, 0.0)               | 39.6 (29.8, 50.6)         | 19.2 (12.6, 26.6)           | 43.3 (29.3, 61.0)       | 27.8 (20.8, 36.3)                    | 0.8 (0.0, 2.8)                 | 1.8 (0.0, 4.8)              | 38.4 (33.9, 43.1)    |
| Macrolides                                                                                                   | 689.9 (651.4, 730.3)         | 2.3 (0.4, 4.9)               | 56.4 (43.3, 69.5)         | 66.1 (53.2, 79.0)           | 277.8 (248.5, 306.7)    | 61.8 (46.9, 75.9)                    | 5.7 (2.5, 9.2)                 | 36.5 (23.5, 50.4)           | 149.3 (137.6, 160.7) |
| Sulfonamides                                                                                                 | 7.6 (3.1, 12.9)              | 2.8 (0.0, 6.5)               | 65.3 (49.7, 83.1)         | 32.8 (24.8, 41.4)           | 170.9 (143.8, 197.3)    | 131.2 (112.8, 150.9)                 | 7.3 (4.1, 11.1)                | 134.1 (113.2, 157)          | 69.8 (63.9, 76.8)    |
| Other                                                                                                        | 535.2 (493.1, 580.4)         | 38.1 (29.0, 47.4)            | 312.4 (282.4, 342.7)      | 171.3 (155.0, 187.5)        | 462.8 (430.4, 497.1)    | 651.1 (600.3, 701.1)                 | 75.6 (68.1, 83.2)              | 652.1 (619.8, 684.5)        | 366.1 (352.8, 380.2) |
| Data are incidence rates for any bacterial pathogen per 100 child years with 95% confidence intervals (CIs). |                              |                              |                           |                             |                         |                                      |                                |                             |                      |

**Figure S3. Days of antibiotic exposure per 100 child years for asymptotically carried enteric pathogens among 1715 children in the MAL-ED cohort.**

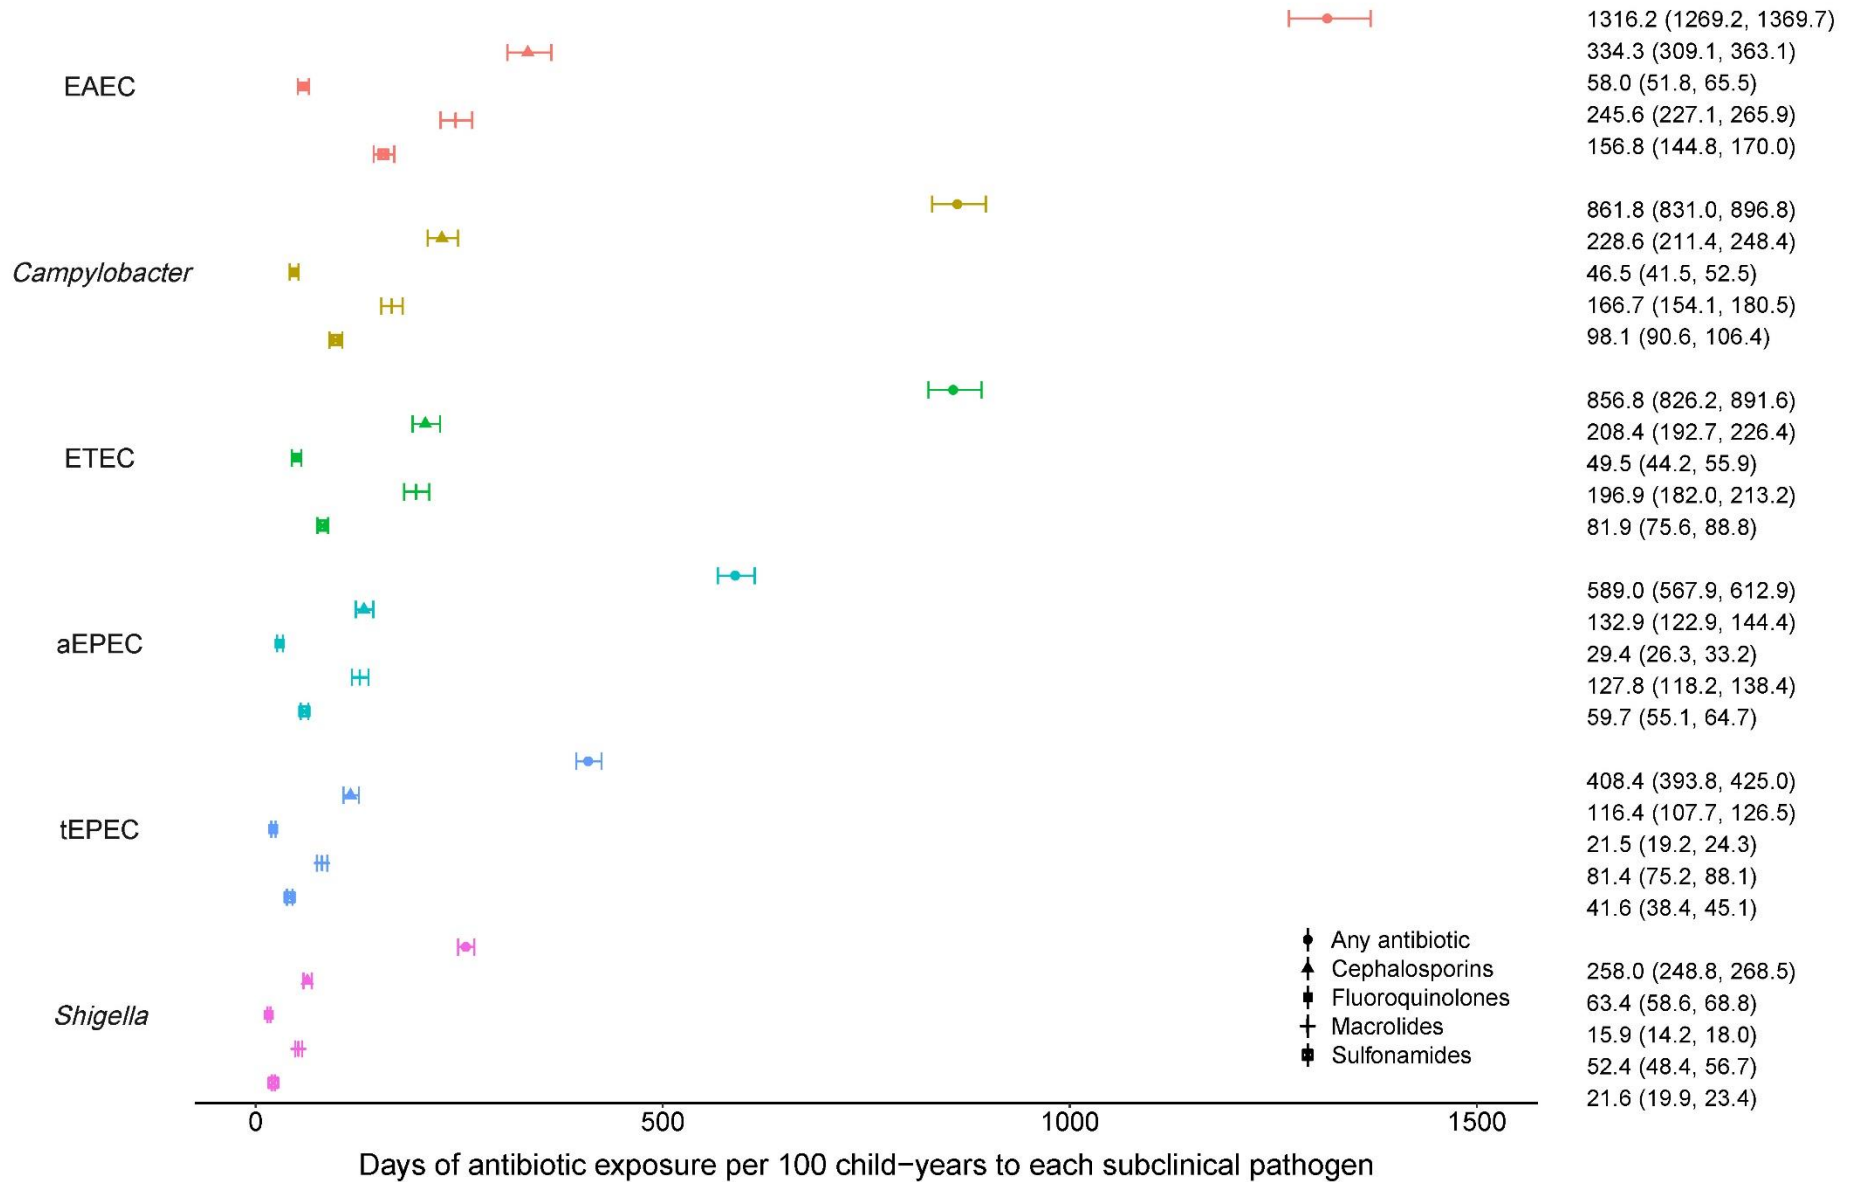

**Figure S4. Sensitivity analysis: Incident rates per 100 child years of enteric pathogen exposures to antibiotics and the proportion of exposures that were due to diarrheal prompting treatment vs. bystander exposure among 1715 children in the MAL-ED cohort when bystander pathogens were identified from the nearest stool collected in the 21 days prior to the antibiotic course.**

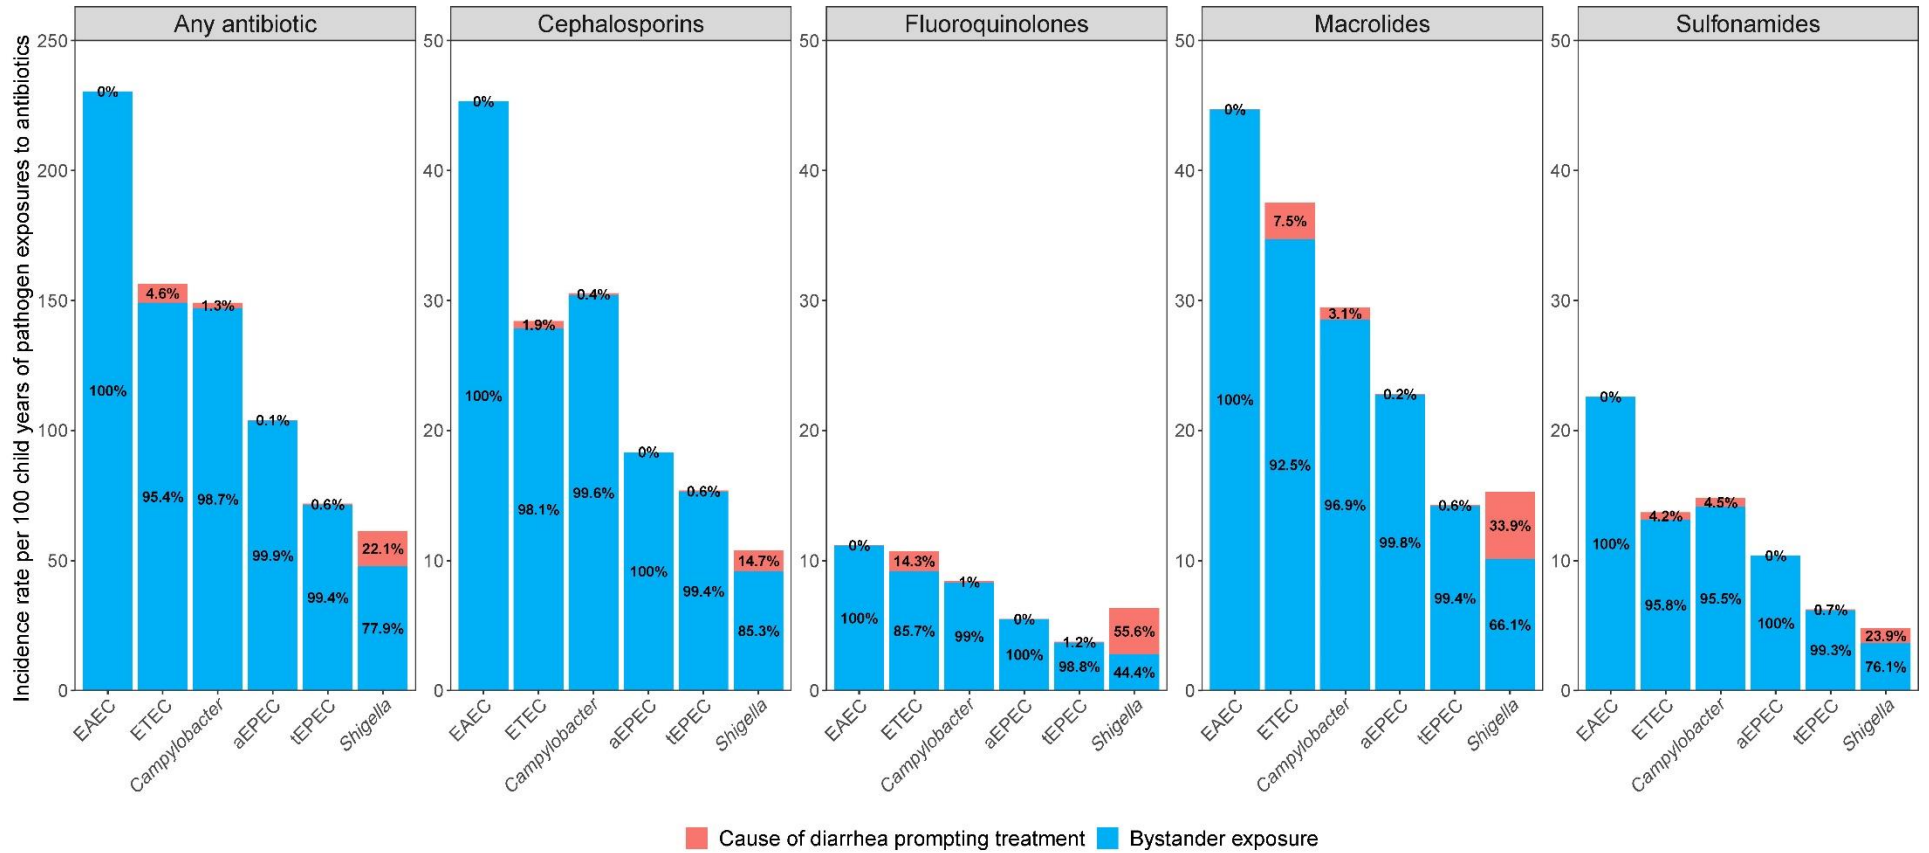

**Figure S5. Sensitivity analysis: Incident rates per 100 child years of enteric pathogen exposures to antibiotics and the proportion of exposures that were due to diarrheal prompting treatment vs. bystander exposure among 1715 children in the MAL-ED cohort when diarrhea etiology was defined by the detection of a pathogen by qPCR at any quantity (quantification cycle threshold < 35).**

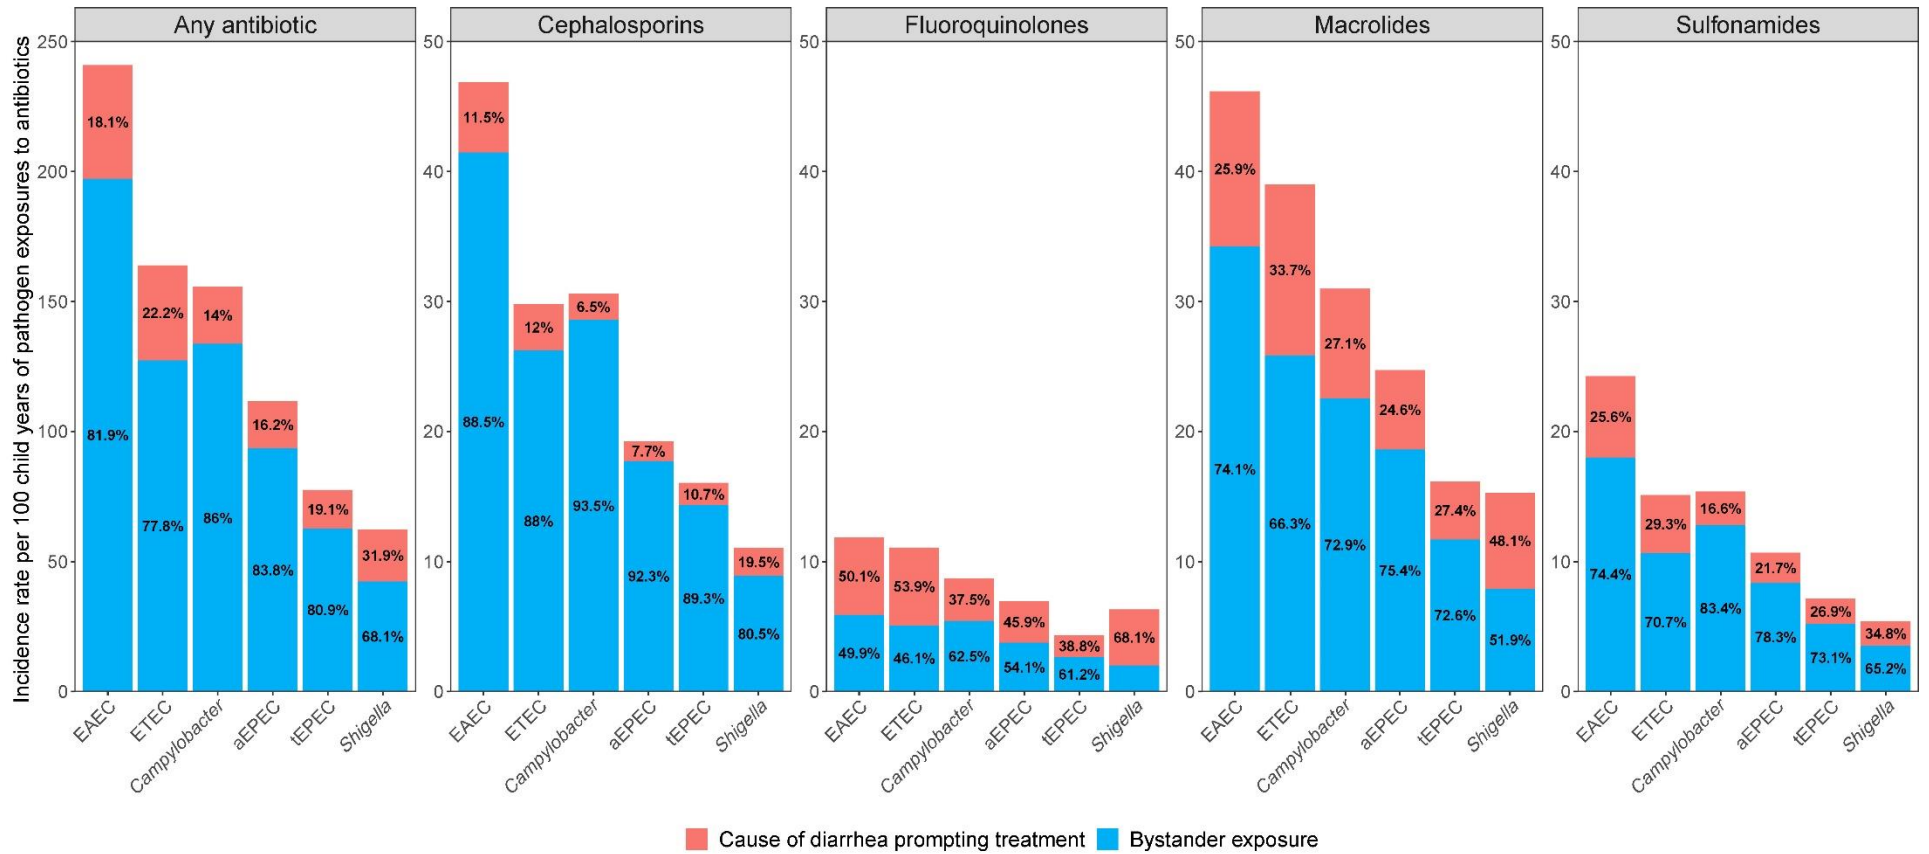



**Table S3. Incidence rates of asymptotically carried pathogen exposures to antibiotics by type of illness resulting in treatment among 1715 children in the MAL-ED cohort.**

| Type of illness                   | EAEC              | <i>Campylobacter</i> | ETEC              | aEPEC             | tEPEC             | <i>Shigella</i>   | Any asymptotically carried pathogen |
|-----------------------------------|-------------------|----------------------|-------------------|-------------------|-------------------|-------------------|-------------------------------------|
| Acute lower respiratory infection | 29.4 (26.9, 32.1) | 20.7 (18.2, 23.2)    | 15.7 (13.9, 17.5) | 10.9 (9.6, 12.3)  | 9.2 (7.9, 10.6)   | 5.4 (4.5, 6.4)    | 91.3 (83.7, 99.1)                   |
| Upper respiratory infection       | 86.3 (82.2, 90.8) | 52.2 (48.9, 55.8)    | 56.6 (52.8, 60.5) | 40.6 (37.8, 43.7) | 26.3 (24.1, 28.6) | 18.1 (16.2, 20.1) | 280.0 (266.6, 295.5)                |
| Dysentery                         | 6.2 (5.2, 7.3)    | 3.0 (2.4, 3.7)       | 3.5 (2.7, 4.3)    | 2.3 (1.8, 2.9)    | 1.3 (1.0, 1.8)    | 0.9 (0.5, 1.3)    | 17.3 (14.6, 20.1)                   |
| Diarrhea                          | 51.7 (48.8, 55.0) | 33.4 (30.8, 36.1)    | 33.3 (30.9, 35.9) | 22.5 (20.5, 24.3) | 16.7 (15.0, 18.4) | 8.4 (7.1, 9.7)    | 166.0 (156.5, 175.7)                |
| Other cause                       | 55.9 (52.6, 59.5) | 37.9 (34.7, 41.2)    | 37.8 (35.3, 40.6) | 27.7 (25.5, 29.8) | 16.8 (15.3, 18.5) | 13.3 (12.0, 14.7) | 189.5 (179.4, 200.1)                |

Data are incidence rates per 100 child years with 95% confidence intervals (CIs). These data also reported in Figure 3. EAEC = enteroaggregative *Escherichia coli*. ETEC= enterotoxigenic *Escherichia coli*. aEPEC = atypical enteropathogenic *Escherichia coli*. tEPEC = typical enteropathogenic *Escherichia coli*.

**Figure S6. Incidence rates per 100 child years of enteric pathogen exposures to fluoroquinolones and macrolides and the proportion of exposures due to type of illness among 1715 children in the MAL-ED cohort.**

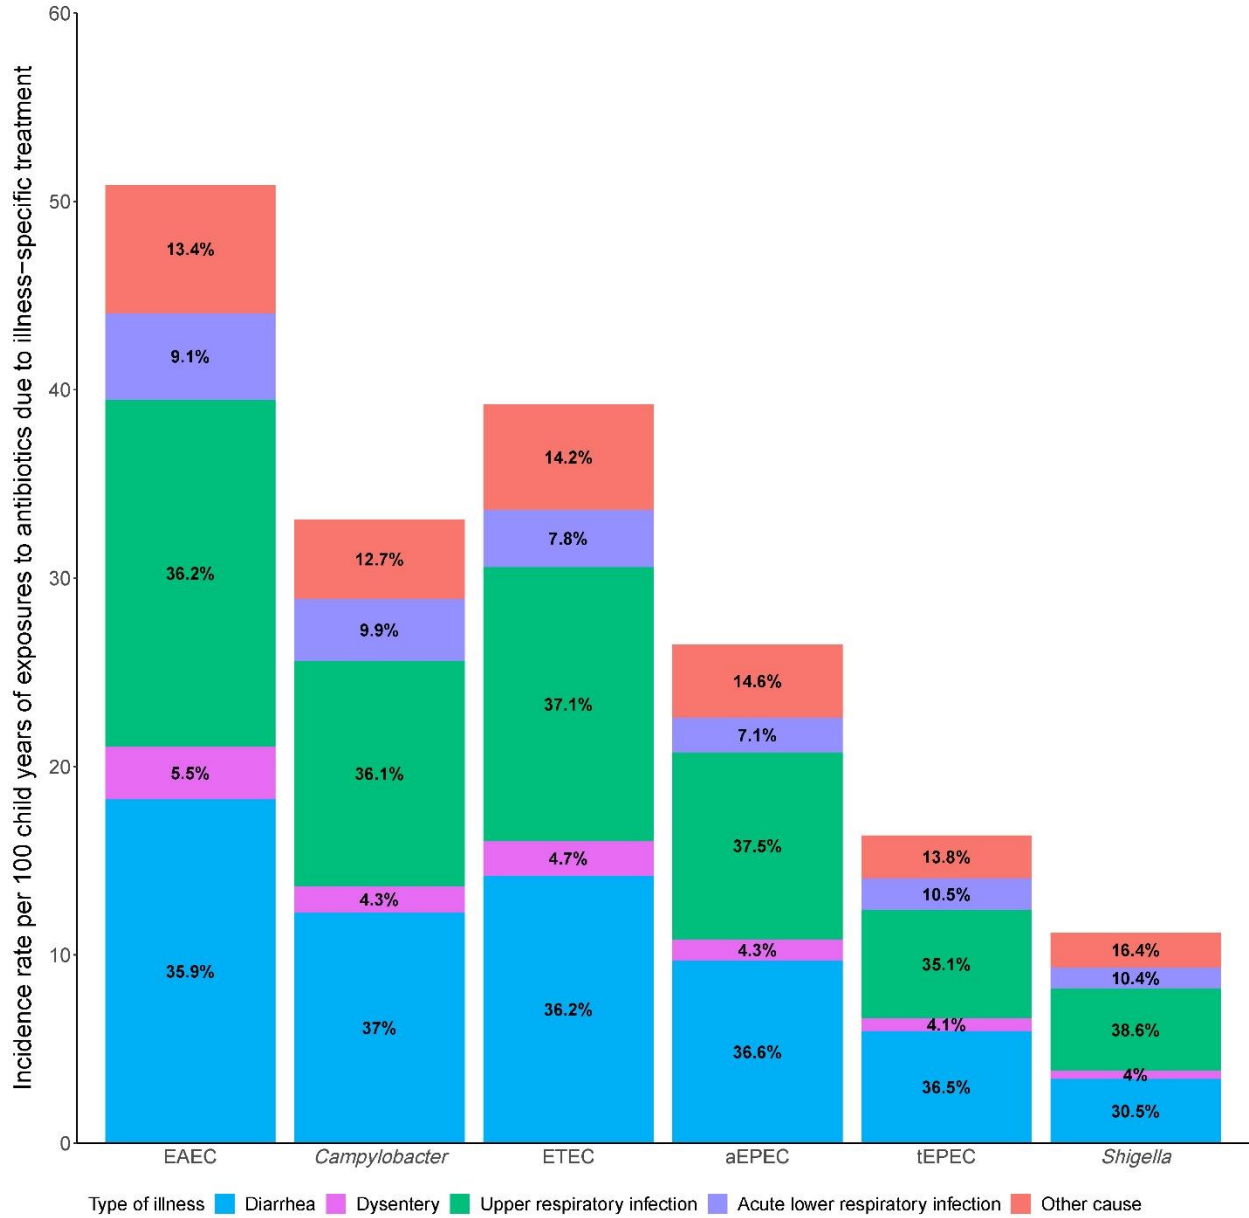

**Table S4. Incidence rates of asymptotically carried pathogen exposures to fluoroquinolones or macrolides by type of illness resulting in treatment among 1715 children in the MAL-ED cohort.**

| Type of illness                   | EAEC              | <i>Campylobacter</i> | ETEC              | aEPEC           | tEPEC          | <i>Shigella</i> | Any asymptotically carried pathogen |
|-----------------------------------|-------------------|----------------------|-------------------|-----------------|----------------|-----------------|-------------------------------------|
| Acute lower respiratory infection | 4.6 (3.8, 5.5)    | 3.3 (2.5, 4.1)       | 3.1 (2.4, 3.8)    | 1.9 (1.4, 2.4)  | 1.7 (1.3, 2.2) | 1.2 (0.8, 1.6)  | 15.7 (13.3, 18.5)                   |
| Upper respiratory infection       | 18.4 (16.8, 20.0) | 12.0 (10.7, 13.4)    | 14.5 (13.0, 16.0) | 9.9 (8.7, 11.1) | 5.7 (4.9, 6.6) | 4.3 (3.6, 5.1)  | 64.9 (59.8, 69.6)                   |
| Dysentery                         | 2.8 (2.1, 3.5)    | 1.4 (1.0, 1.9)       | 1.8 (1.3, 2.4)    | 1.1 (0.8, 1.5)  | 0.7 (0.4, 0.9) | 0.5 (0.2, 0.7)  | 8.3 (6.4, 10.1)                     |
| Diarrhea                          | 18.3 (16.7, 19.9) | 12.2 (10.7, 13.8)    | 14.2 (12.7, 15.7) | 9.7 (8.6, 10.9) | 6.0 (5.1, 6.9) | 3.4 (2.7, 4.1)  | 63.8 (58.5, 68.8)                   |
| Other cause                       | 6.8 (5.8, 7.7)    | 4.2 (3.5, 5.0)       | 5.6 (4.8, 6.4)    | 3.9 (3.2, 4.6)  | 2.3 (1.7, 2.8) | 1.8 (1.4, 2.4)  | 24.5 (21.7, 27.3)                   |

Data are incidence rates per 100 child years with 95% confidence intervals (CIs). These data also reported in Figure S5. EAEC = enteroaggregative *Escherichia coli*. ETEC= enterotoxigenic *Escherichia coli*. aEPEC = atypical enteropathogenic *Escherichia coli*. tEPEC = typical enteropathogenic *Escherichia coli*.

**Table S5. Frequency and incidence rate ratios for the total number of times asymptotically carried bacterial pathogens were exposed to any antibiotic among 1715 children in the MAL-ED cohort**

| Characteristic                                                         | Overall<br>(N=1715 <sup>a</sup> ) | Incidence Rate Ratio<br>(95% CI)<br>Individual Models <sup>b</sup> | Incidence Rate Ratio<br>(95% CI)<br>Multivariable Model <sup>c</sup> |
|------------------------------------------------------------------------|-----------------------------------|--------------------------------------------------------------------|----------------------------------------------------------------------|
| <b>Child characteristics</b>                                           |                                   |                                                                    |                                                                      |
| Female (n, %)                                                          | 841 (49.0)                        | 0.86 (0.84, 0.89)                                                  | 0.87 (0.84, 0.89)                                                    |
| Enrollment WAZ (mean, SD)                                              | -0.80 (1.09)                      | 1.01 (0.99, 1.02)                                                  | 1.01 (1.00, 1.02)                                                    |
| Enrollment LAZ <sup>d</sup> (mean, SD)                                 | -0.88 (1.05)                      | 1.00 (0.98, 1.01)                                                  | --                                                                   |
| Days exclusively breastfed in month increments <sup>e</sup> (mean, SD) | 2.62 (1.92)                       | 0.98 (0.97, 0.99)                                                  | 0.98 (0.97, 0.99)                                                    |
| <b>Sociodemographics</b>                                               |                                   |                                                                    |                                                                      |
| WAMI score in 0.5 increments (mean, SD)                                | 1.14 (0.45)                       | 0.90 (0.86, 0.94)                                                  | --                                                                   |
| Household income ( $\geq$ 150 USD) (n, %)                              | 707 (41.2)                        | 0.98 (0.95, 1.01)                                                  | 0.98 (0.95, 1.01)                                                    |
| Maternal education ( $\geq$ 6 years) <sup>f</sup> (n, %)               | 1398 (81.5)                       | 1.03 (1.00, 1.07)                                                  | 1.05 (1.01, 1.09)                                                    |
| Maternal age in 5 year increments <sup>g</sup> (mean, SD)              | 5.26 (1.18)                       | 1.00 (0.99, 1.02)                                                  | 1.00 (0.99, 1.01)                                                    |
| <b>Water and sanitation</b>                                            |                                   |                                                                    |                                                                      |
| Improved source of drinking water (n, %)                               | 1544 (90.0)                       | 0.95 (0.89, 1.01)                                                  | 0.95 (0.89, 1.01)                                                    |
| Treated water (n, %)                                                   | 301 (17.6)                        | 0.94 (0.91, 0.98)                                                  | 0.94 (0.90, 0.98)                                                    |
| Access to improved latrine (n, %)                                      | 1237 (72.1)                       | 0.91 (0.88, 0.95)                                                  | 0.92 (0.89, 0.96)                                                    |
| <b>Site (n, %)</b>                                                     |                                   |                                                                    |                                                                      |
| Dhaka, Bangladesh                                                      | 210 (12.2)                        | --                                                                 | --                                                                   |
| Fortaleza, Brazil                                                      | 165 (9.6)                         | 0.03 (0.02, 0.03)                                                  | 0.02 (0.02, 0.03)                                                    |
| Vellore, India                                                         | 227 (13.2)                        | 0.41 (0.39, 0.43)                                                  | 0.37 (0.35, 0.39)                                                    |
| Bhaktapur, Nepal                                                       | 227 (13.2)                        | 0.21 (0.20, 0.22)                                                  | 0.20 (0.19, 0.21)                                                    |
| Loreto, Peru                                                           | 194 (11.3)                        | 0.61 (0.58, 0.63)                                                  | 0.53 (0.50, 0.56)                                                    |
| Naushero Feroze, Pakistan                                              | 246 (14.3)                        | 0.73 (0.71, 0.76)                                                  | 0.65 (0.61, 0.69)                                                    |
| Venda, South Africa                                                    | 237 (13.8)                        | 0.05 (0.04, 0.05)                                                  | 0.04 (0.04, 0.05)                                                    |
| Haydom, Tanzania                                                       | 209 (12.2)                        | 0.45 (0.43, 0.47)                                                  | 0.37 (0.34, 0.40)                                                    |

LAZ = length for age z score. SD = standard deviation. USD = United States dollar. WAMI = Water, Assets, Maternal Education, Income. WAZ = weight for age z score. <sup>a</sup> Of whom 1595 were exposed to at least one course of antibiotics.  
<sup>b</sup> Adjusted for site. <sup>c</sup> LAZ and WAMI removed from the model. The components of WAMI are household income, maternal education, improved water, and improved latrine. Therefore, WAMI score was removed from the multivariable model to avoid collinearity. <sup>d</sup> Pakistan excluded due to invalid measurements (N=246). <sup>e</sup> Days of exclusive breastfeeding includes all days. <sup>f</sup> Missing data (N=2) was imputed based on country average and then rounded to the nearest whole number. <sup>g</sup> Missing data (N=2) was based on site mean.

**Table S6. Effect of class-specific antibiotic exposure in the last 30 days on the prevalence of resistance to the same drug class in 2434 cultured *E. coli* isolates.**

| Antibiotic class <sup>a</sup> | N (%) isolates exposed to antibiotics in last 30 days | N (%) isolates with resistance | Prevalence Ratio <sup>b</sup> (95% CI) |
|-------------------------------|-------------------------------------------------------|--------------------------------|----------------------------------------|
| Macrolides                    | 209 (8.6)                                             | 694 (28.5)                     | 1.29 (1.13, 1.47)                      |
| Fluoroquinolones              | 41 (1.7)                                              | 552 (22.7)                     | 1.18 (0.83, 1.70)                      |
| Sulfonamides                  | 156 (6.4)                                             | 1617 (66.4)                    | 1.02 (0.90, 1.15)                      |
| Cephalosporins                | 298 (12.2)                                            | 706 (29.0)                     | 1.06 (0.93, 1.21)                      |

<sup>a</sup> Antibiotic resistance for macrolides defined by azithromycin susceptibility testing, for fluoroquinolones by ciprofloxacin, for sulfonamides by trimethoprim/sulfamethoxazole, and for cephalosporins by ceftriaxone. <sup>b</sup> Adjusted for site, age, sex, WAMI index, and hospitalization in the last 90 days

**Table S7. Classification of resistant *E. coli* for each antibiotic.**

| <b>Antibiotic</b>             | <b>Cutoff for presence of resistant <i>E. coli</i> <sup>a</sup></b> |
|-------------------------------|---------------------------------------------------------------------|
| Ceftriaxone                   | <23                                                                 |
| Ciprofloxacin                 | <21                                                                 |
| Trimethoprim/Sulfamethoxazole | <16                                                                 |
| Azithromycin (E-test)         | ≥32                                                                 |

<sup>a</sup> Antibiotic susceptibility testing was performed using E-test for azithromycin and disk diffusion for all other antibiotics.
